# Supplementary material for: Sorafenib and tetrakis (4-carboxyphenyl) porphyrin assembled nanoparticles for synergistic targeted chemotherapy and sonodynamic therapy of hepatocellular carcinoma
Source: Royal Society of Chemistry journal article supplement (doi:10.1039/d3bm01994b), 2024-01-01
Supplement: d3bm01994b1.pdf [file d3bm01994b1.pdf]

## Supporting Information

### Sorafenib and tetrakis (4-carboxyphenyl) porphyrin assembled nanoparticles for synergistic targeted chemotherapy and sonodynamic therapy of hepatocellular carcinoma

Yongzhi Chen,<sup>a</sup> Qiuxia Tan,<sup>b</sup> Yuanyu Tang,<sup>b</sup> E Pang,<sup>b</sup> Rui Peng,<sup>a</sup> Minhuan Lan,<sup>\*b</sup>  
Dousheng Bai<sup>\*a</sup>

<sup>a</sup> Department of Hepatobiliary Surgery, Clinical Medical College, Yangzhou University, 98 West Nantong Rd, Yangzhou 225000, P.R. China.

<sup>b</sup> Hunan Provincial Key Laboratory of Micro & Nano Materials Interface Science, College of Chemistry and Chemical Engineering, Central South University, Changsha, Hunan, 410083, P. R. China.

Corresponding authors.

minhuanlan@csu.edu.cn (M. Lan); drbaidousheng@yzu.edu.cn (D. Bai)

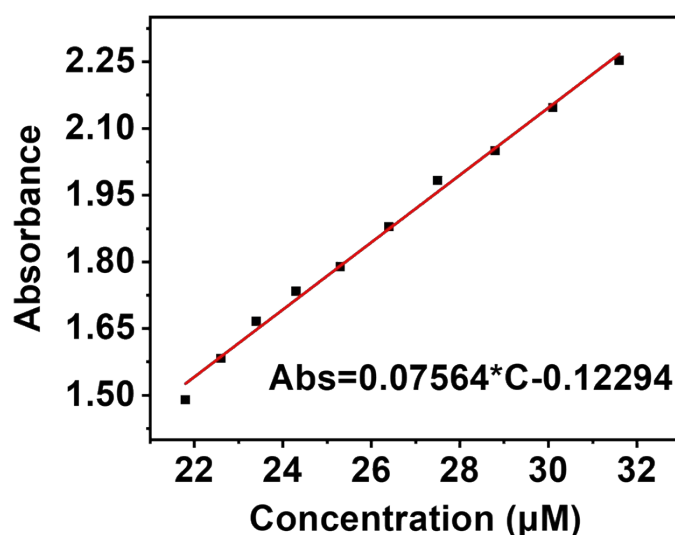

**Fig. S1** The absorbance and concentration relationship of TCPP. (Abs represents absorbance of STP NPs, C represents the concentration of STP NPs)



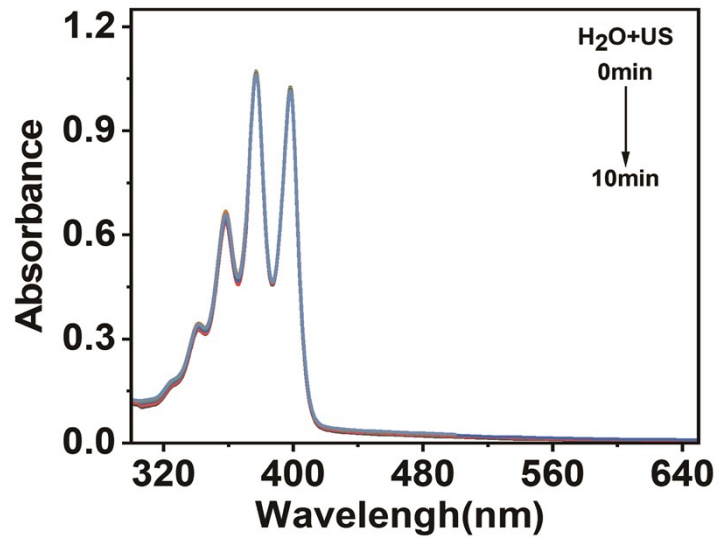

**Fig. S6** UV-vis absorption spectra of ABDA- $\text{Na}_2$  in the absence of STP NPs after US irradiation for different times.

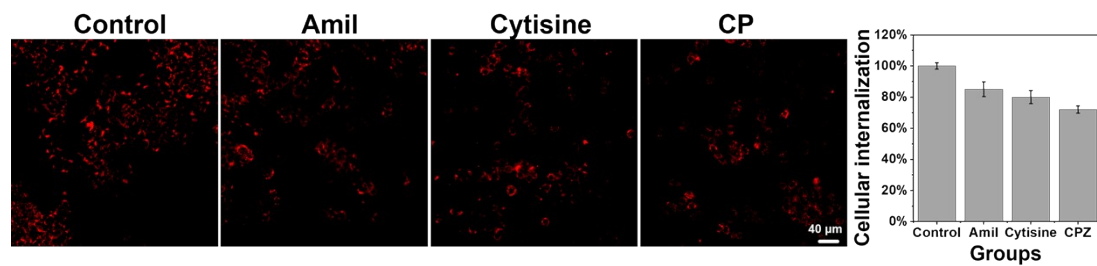

**Fig. S7** Inverted microscope images displaying intracellular uptake of STP NPs (red fluorescence).

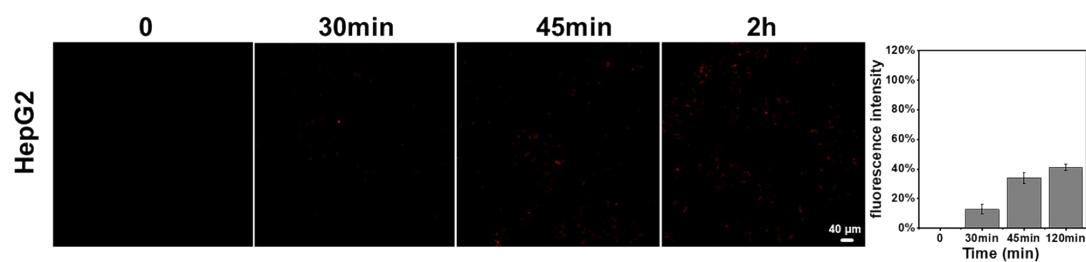

**Fig. S8** Incubation time-dependent fluorescent images of HepG2 cells in the presence of SOR-TCPP@PEG NPs.

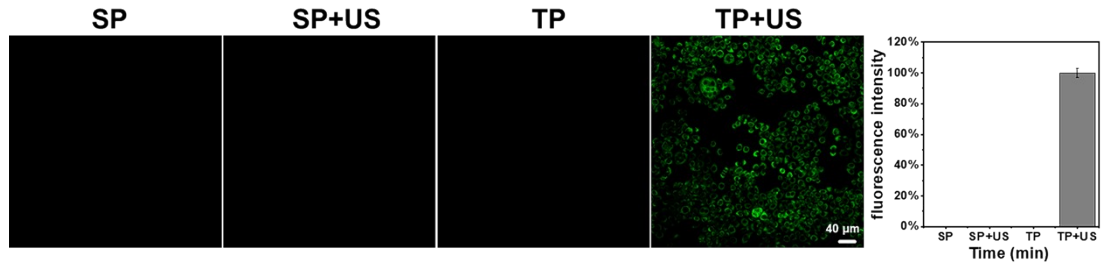

**Fig. S9** Fluorescent images of O22-HepG2 cells under different treatments: SP, SP + US, TP, and TP + US.

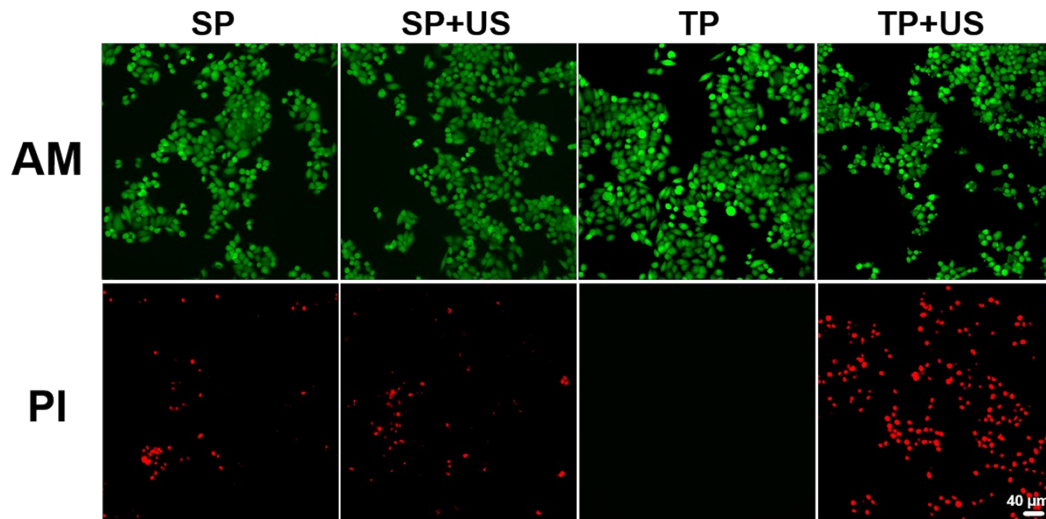

**Fig. S10** Calcein-AM- and PI-stained HepG2 cells after different treatments: SP, SP + US, TP, and TP + US.

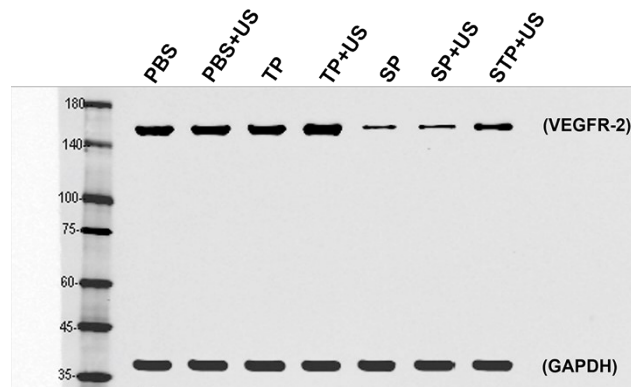

**Fig. S11** The full gel and blot image of western blot.

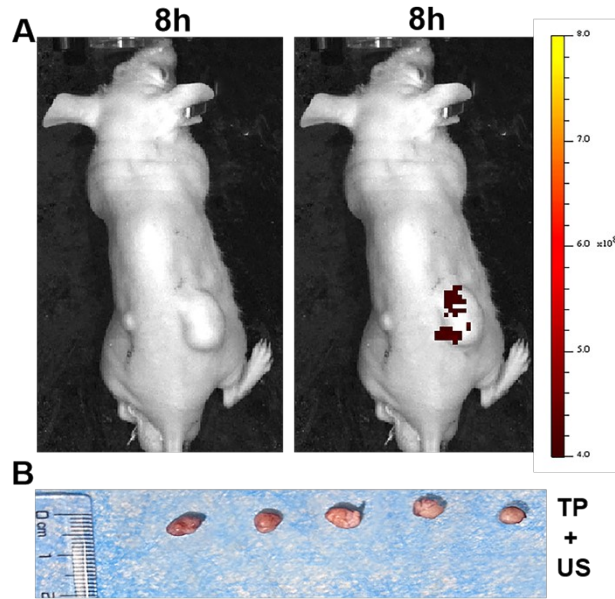

**Fig. S12** (A) Fluorescence imaging of SOR-TCPP@PEG NPs within mouse tumor at 8 h. (B) Tumor photographs of nude mice were taken after TP + US treatments.

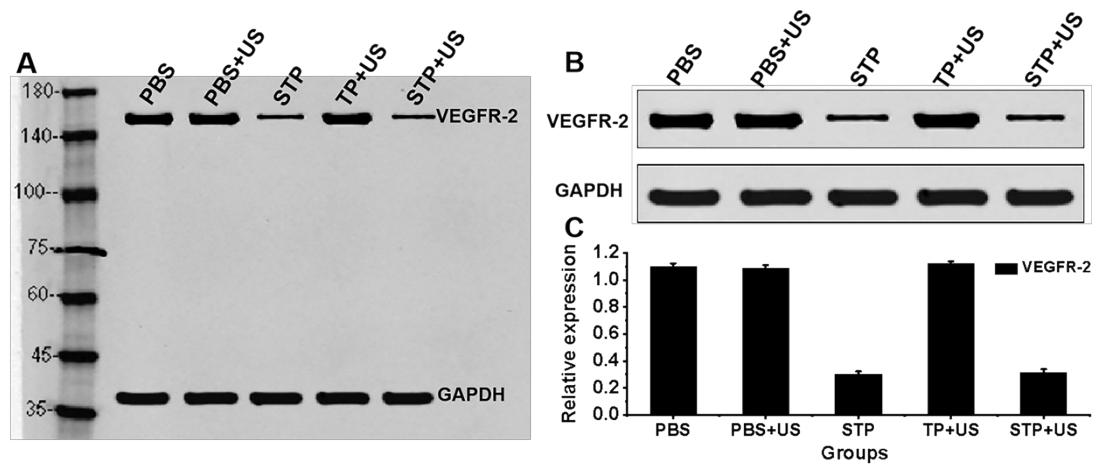

**Fig. S13** Western blotting was used to analyze the expression of VEGFR-2 in tumor tissues after different treatments.
